# Supplementary material for: Healthcare resource utilization and associated cost of patients with bone metastases from solid tumors who are naïve to bone-targeting agents: a comparative analysis of patients with and without skeletal-related events
Source: Springer Nature journal article supplement (doi:10.1007/s10198-020-01247-z), 2021-01-18

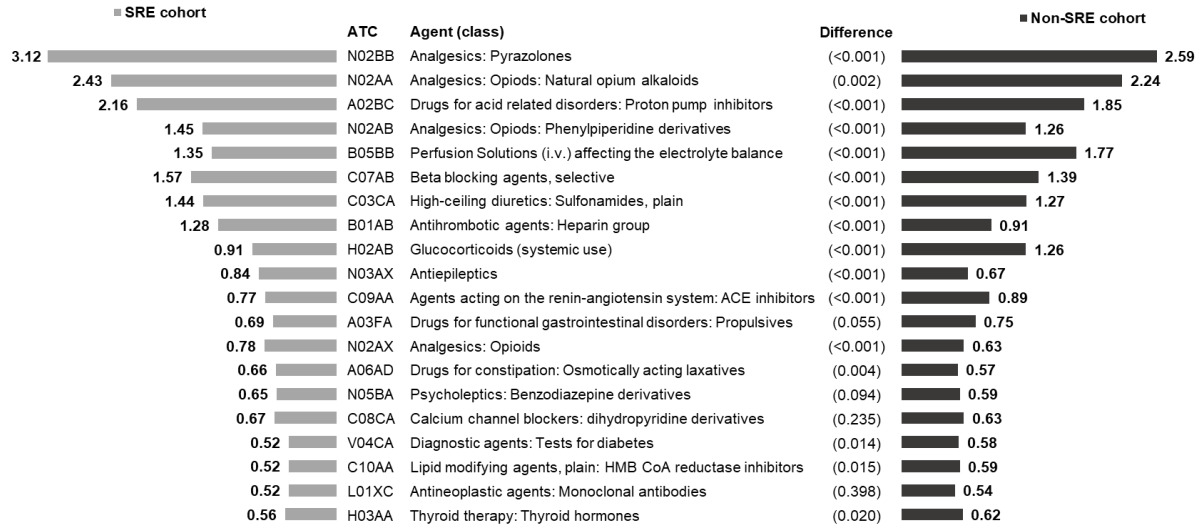

Supplement: MOESM1 [file 18776442]
